# Supplementary material
Source: PubMed Central journal article supplement (PMC5739054)
Supplement: NIHMS885639-supplement-Supplemental_figures_and_tables.pdf [file NIHMS885639-supplement-Supplemental_figures_and_tables.pdf]

## Supplemental Figure I

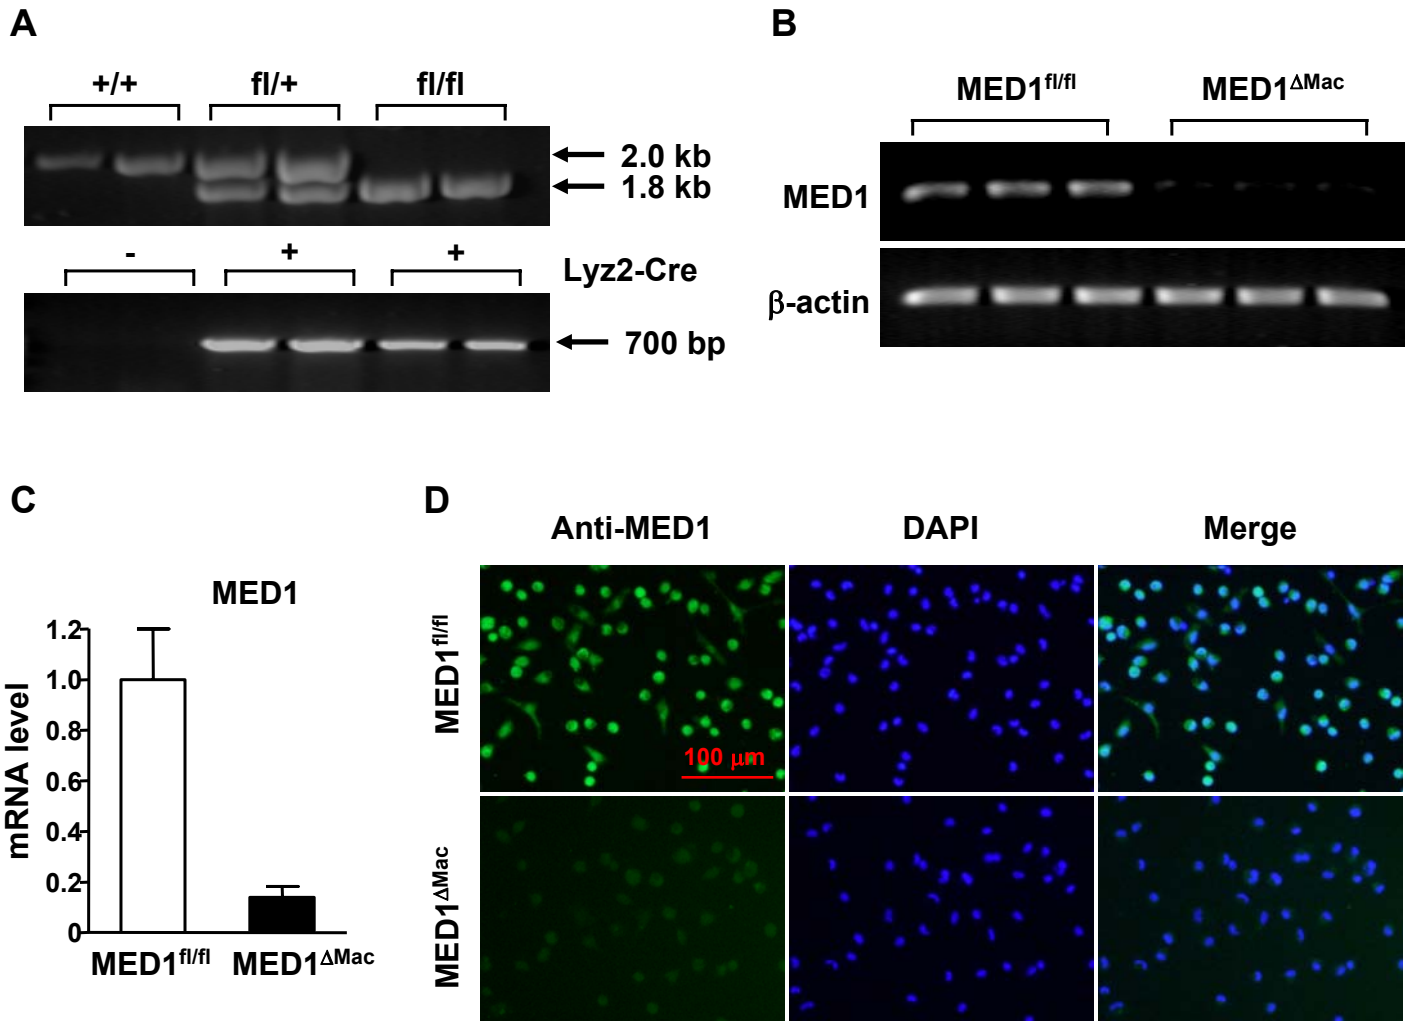

**Supplemental Figure I. Macrophage-specific MED1 knockout.** (A) PCR genotyping of mice carrying MED1 (top) and Cre (bottom). (B,C) PMs were isolated from MED1<sup>fl/fl</sup> and MED1<sup>ΔMac</sup> mice (n=6 for each group) and used for detection of MED1 expression by semi-quantitative PCR (B) and qPCR (C). (D) PMs from MED1<sup>fl/fl</sup> and MED1<sup>ΔMac</sup> mice were examined by immunofluorescence staining with the use of anti-MED1 or DAPI. The merged images reveal the presence of MED1 in the nuclei of the wild-type MED1<sup>fl/fl</sup> mice.

## Supplemental Figure II

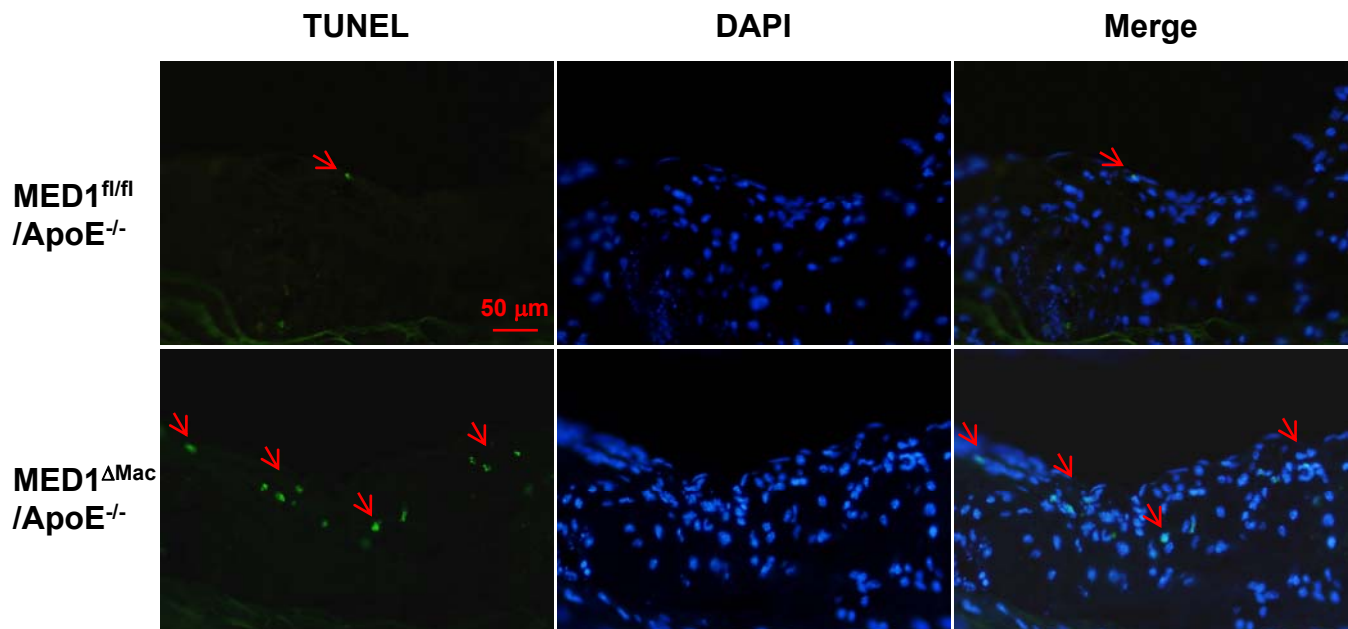

**Supplemental Figure II. Increased apoptosis of aortic root in *MED1<sup>ΔMac</sup>/ApoE<sup>-/-</sup>* mice.** *MED1<sup>fl/fl</sup>/ApoE<sup>-/-</sup>* and *MED1<sup>ΔMac</sup>/ApoE<sup>-/-</sup>* mice were fed on Western diet for 12 weeks. Apoptotic changes of aortic roots were assessed by TUNEL staining. Merge indicates DAPI and TUNEL overlap. Red arrows indicate TUNEL positive cells. The graph are representative of 6 mice per genotype with similar results.

## Supplemental Figure III

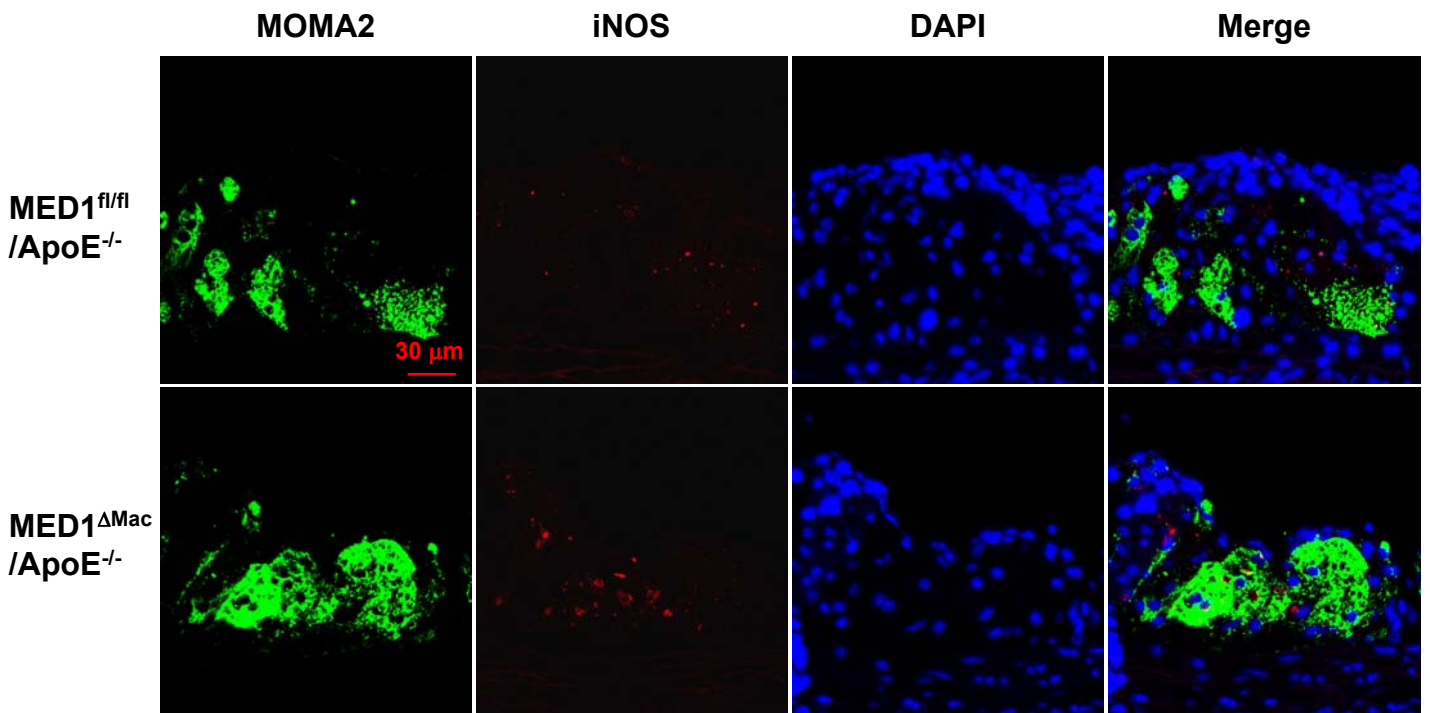

**Supplemental Figure III. M1-like macrophages were increased in the early stage of atherosclerosis in *MED1*<sup>ΔMac</sup>/*ApoE*<sup>-/-</sup> mice.** Immunostaining of atherosclerotic lesions from *MED1*<sup>fl/fl</sup>/*ApoE*<sup>-/-</sup> and *MED1*<sup>ΔMac</sup>/*ApoE*<sup>-/-</sup> mice fed on Western diet for 4 weeks. Macrophages were identified as MOMA2-positive (green) cells. M1-like macrophages were identified as iNOS-positive (red) cells. Merge indicates co-expression of MOMA2 and iNOS. The graphs are representative of 5-6 mice per genotype with similar results.

## Supplemental Figure IV

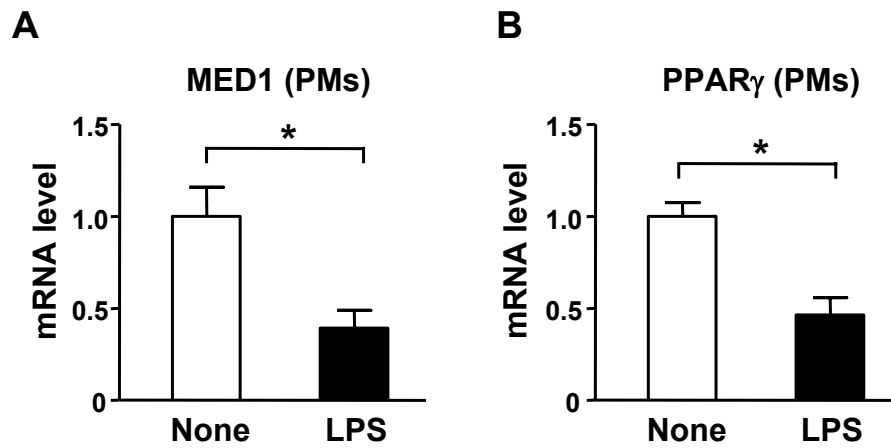

**Supplemental Figure IV. MED1 and PPAR $\gamma$  expression is inhibited by M1 stimuli in PMs.** MED1 (A) and PPAR $\gamma$  (B) mRNA level in MED<sup>fl/fl</sup> PMs after stimulation with LPS (50 ng/ml) for 6 hr. Graphs represent mean  $\pm$  SEM from 6 mice per group. \*  $p < 0.05$ .

## Supplemental Figure V

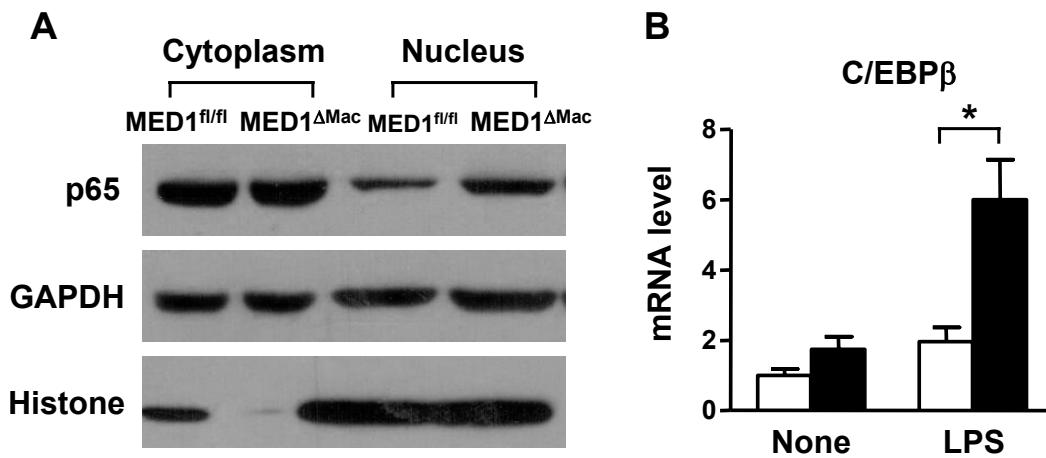

**Supplemental Figure V. The increased expression of p65 and C/EBPβ in MED1-deficient macrophages.** PMs were isolated from MED1<sup>fl/fl</sup> mice and MED1<sup>ΔMac</sup> littermates (n=12 in each group in A, n=6 in each group in B). (A) Western blot analysis of the nucleus and cytoplasm protein level of p65. GAPDH and histone bands were used as loading controls. (B) qPCR analysis of the C/EBPβ mRNA level in MED1<sup>fl/fl</sup> and MED1<sup>ΔMac</sup> PMs treated with or without LPS (50 ng/ml) for 6 hr. \*  $p < 0.05$ .

## Supplemental Figure VI

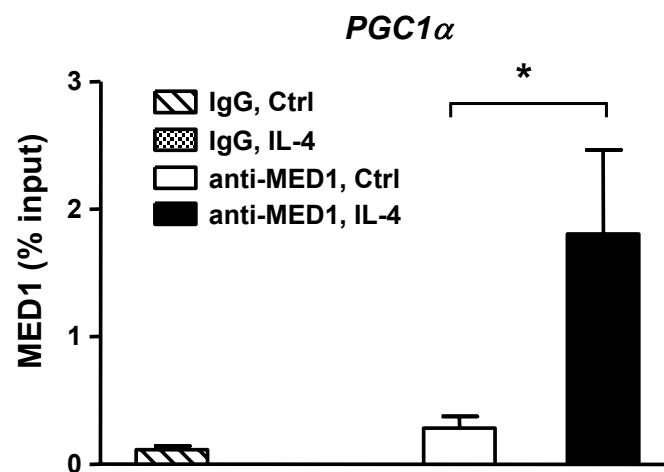

**Supplemental Figure VI. A positive control of a known MED1 target gene *PGC1 $\alpha$* .** RAW264.7 cells were treated with or without IL-4 (10 ng/ml) for 16 hr. ChIP assay was performed to detect the enrichment of MED1 at the promoter of *PGC1 $\alpha$* .

## Supplemental Figure VII

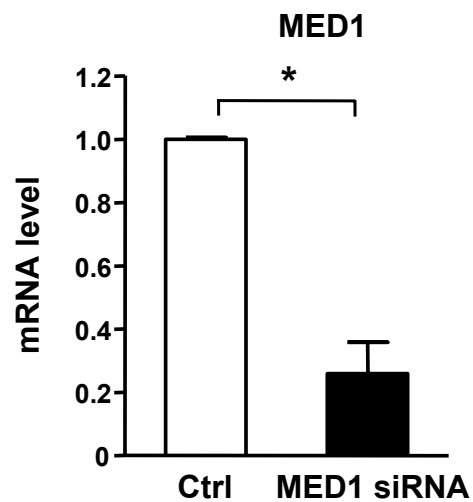

**Supplemental Figure VII. Down-regulation of MED1 expression by MED1 siRNA in RAW264.7 cells.** RAW264.7 cells were transfected with control siRNA or MED1 siRNA for 24 hr, and then MED1 mRNA expression was detected by qPCR. Data are mean  $\pm$  SEM from 3 independent experiments. \*  $p < 0.01$ .

## Supplemental Figure VIII

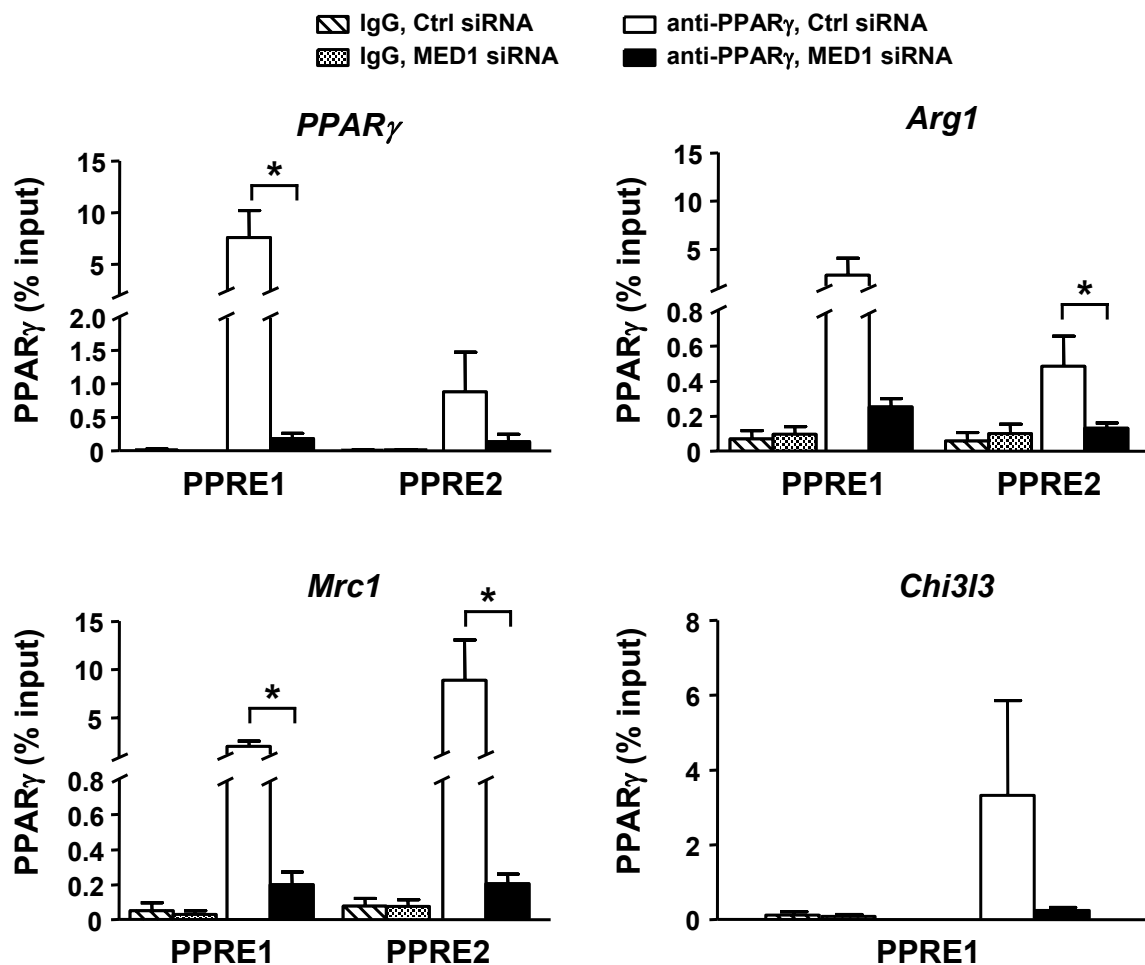

**Supplemental Figure VIII. MED1 knockdown decreased the binding of PPAR $\gamma$  to the PPRE in the promoter region of M2 genes.** RAW264.7 cells were transfected with control or MED1 siRNA for 24 hr, and then nuclear extracts were obtained. ChIP assay was performed to detect PPAR $\gamma$  enrichment at the upstream region of the *PPAR $\gamma$* , *Arg1*, *Mrc1*, and *Chi3l3* gene. The primer sets used in qPCR were sequences adjacent to the predicted PPRES. IgG was used as the isotype control. Data represent as % of input and are mean  $\pm$  SEM from 3 independent experiments \*  $p < 0.05$ .



## Supplemental Figure IX

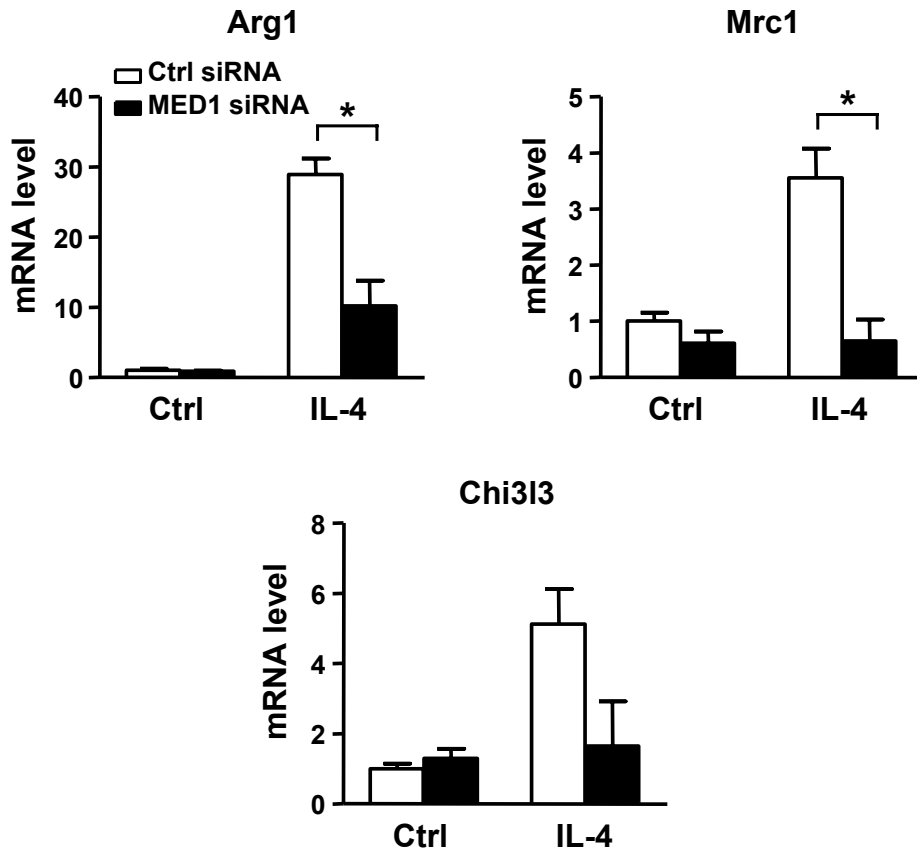

### Supplemental Figure IX. MED1 is required for IL-4-induced M2 polarization.

RAW264.7 cells were transfected with control siRNA or MED1 siRNA for 6 hr prior to treatment with or without IL-4 (10 ng/ml) for 16 hr. qPCR was performed to detect the mRNA level of Arg1, Mrc1, and Chi3l3. Data are mean  $\pm$  SEM from 3 independent experiments. \*  $p < 0.05$ .

## Supplemental Figure X

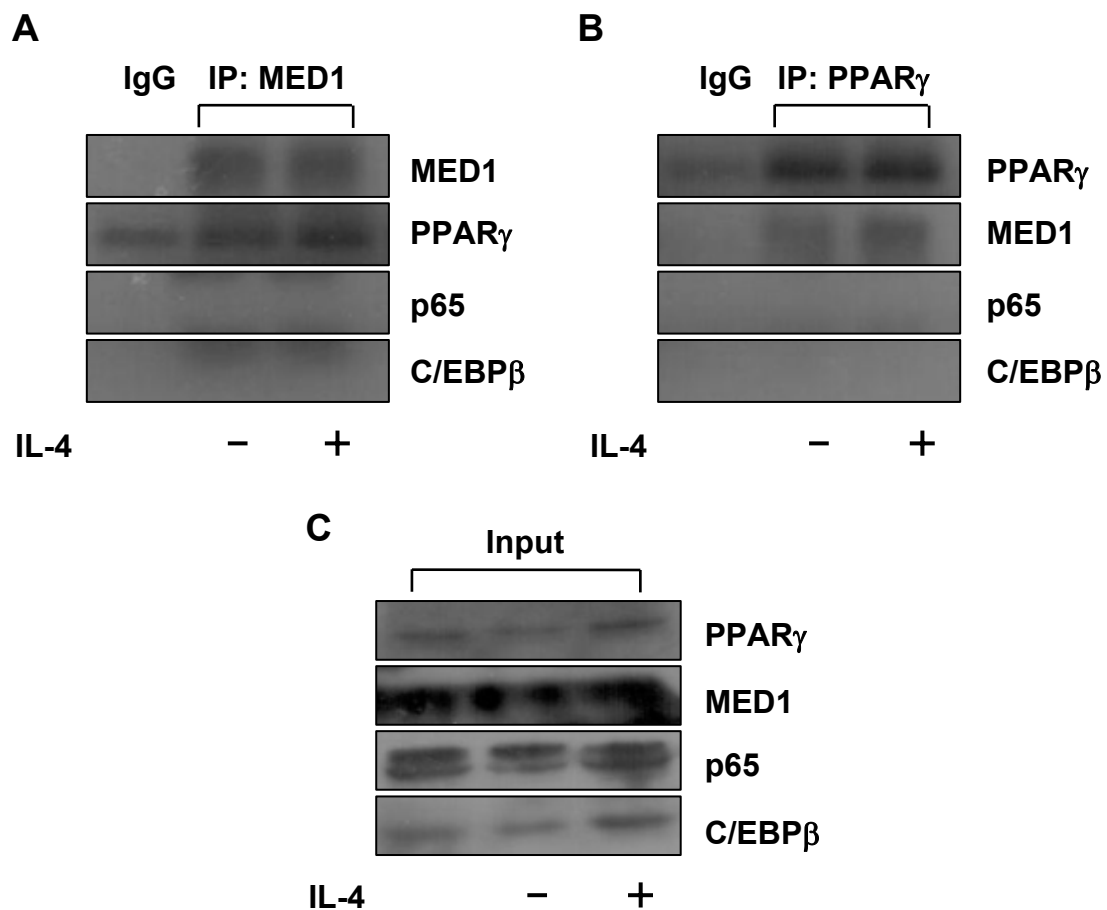

**Supplemental Figure X. MED1 interacts with PPAR $\gamma$  rather than NF- $\kappa$ B and C/EBP $\beta$  under IL-4 treatment.** RAW264.7 cells were treated with or without IL-4 (10 ng/ml) for 16 hr, MED1 (A) and PPAR $\gamma$  (B) was immunoprecipitated. In (C), cell lysates prior to IP were loaded as input controls. All samples were then immunoblotted with anti-MED1, anti-PPAR $\gamma$ , anti-p65, or anti-C/EBP $\beta$  antibody.

## Supplemental Figure XI

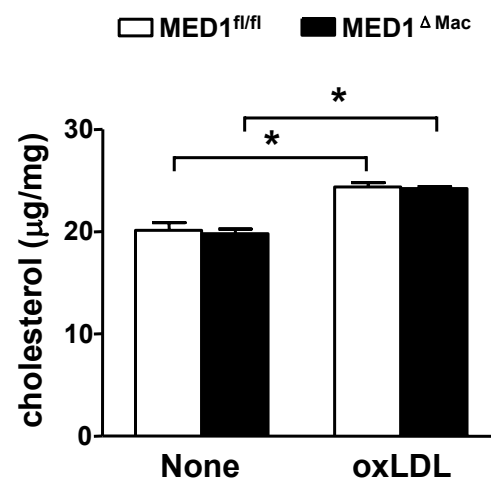

**Supplemental Figure XI. MED1 deficiency does not affect cholesterol levels.** MED1<sup>fl/fl</sup> and MED1<sup>ΔMac</sup> macrophages were incubated with or without oxLDL (50 µg/ml) for 24 hr. Cellular cholesterol contents were normalized to the milligram of cellular protein. Data are mean ± SEM from triplicate determinations.

# Supplemental Figure XII

A

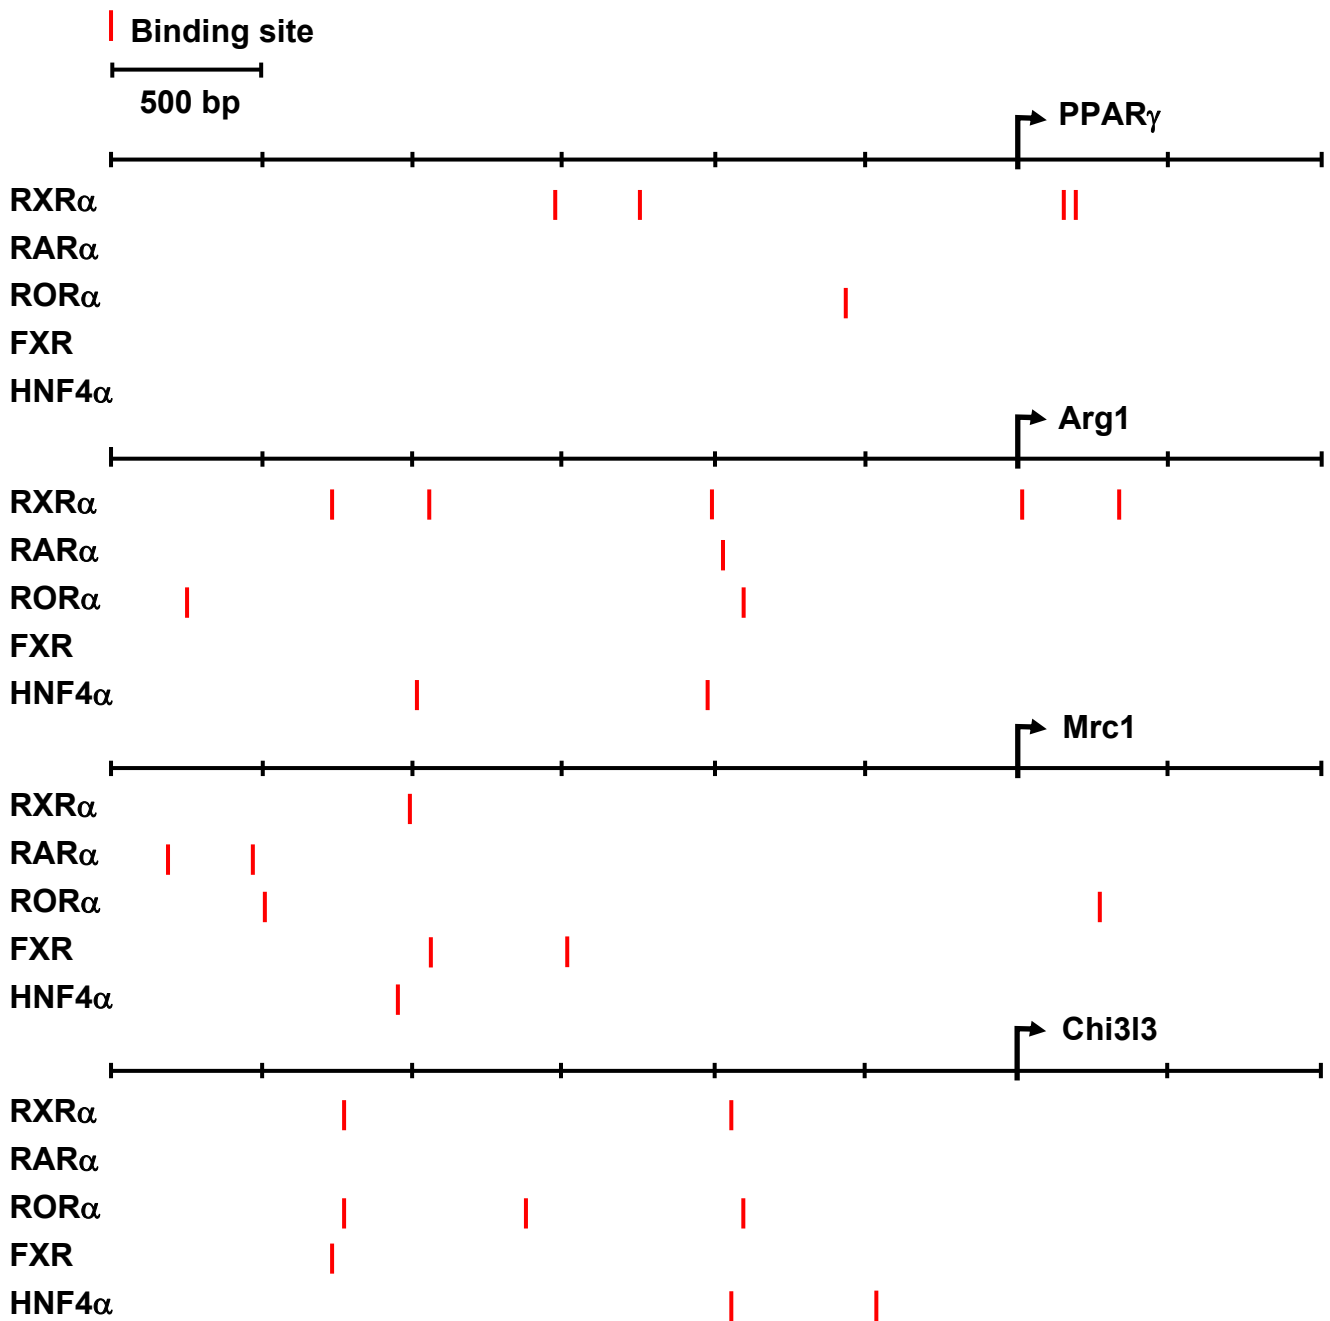

**B**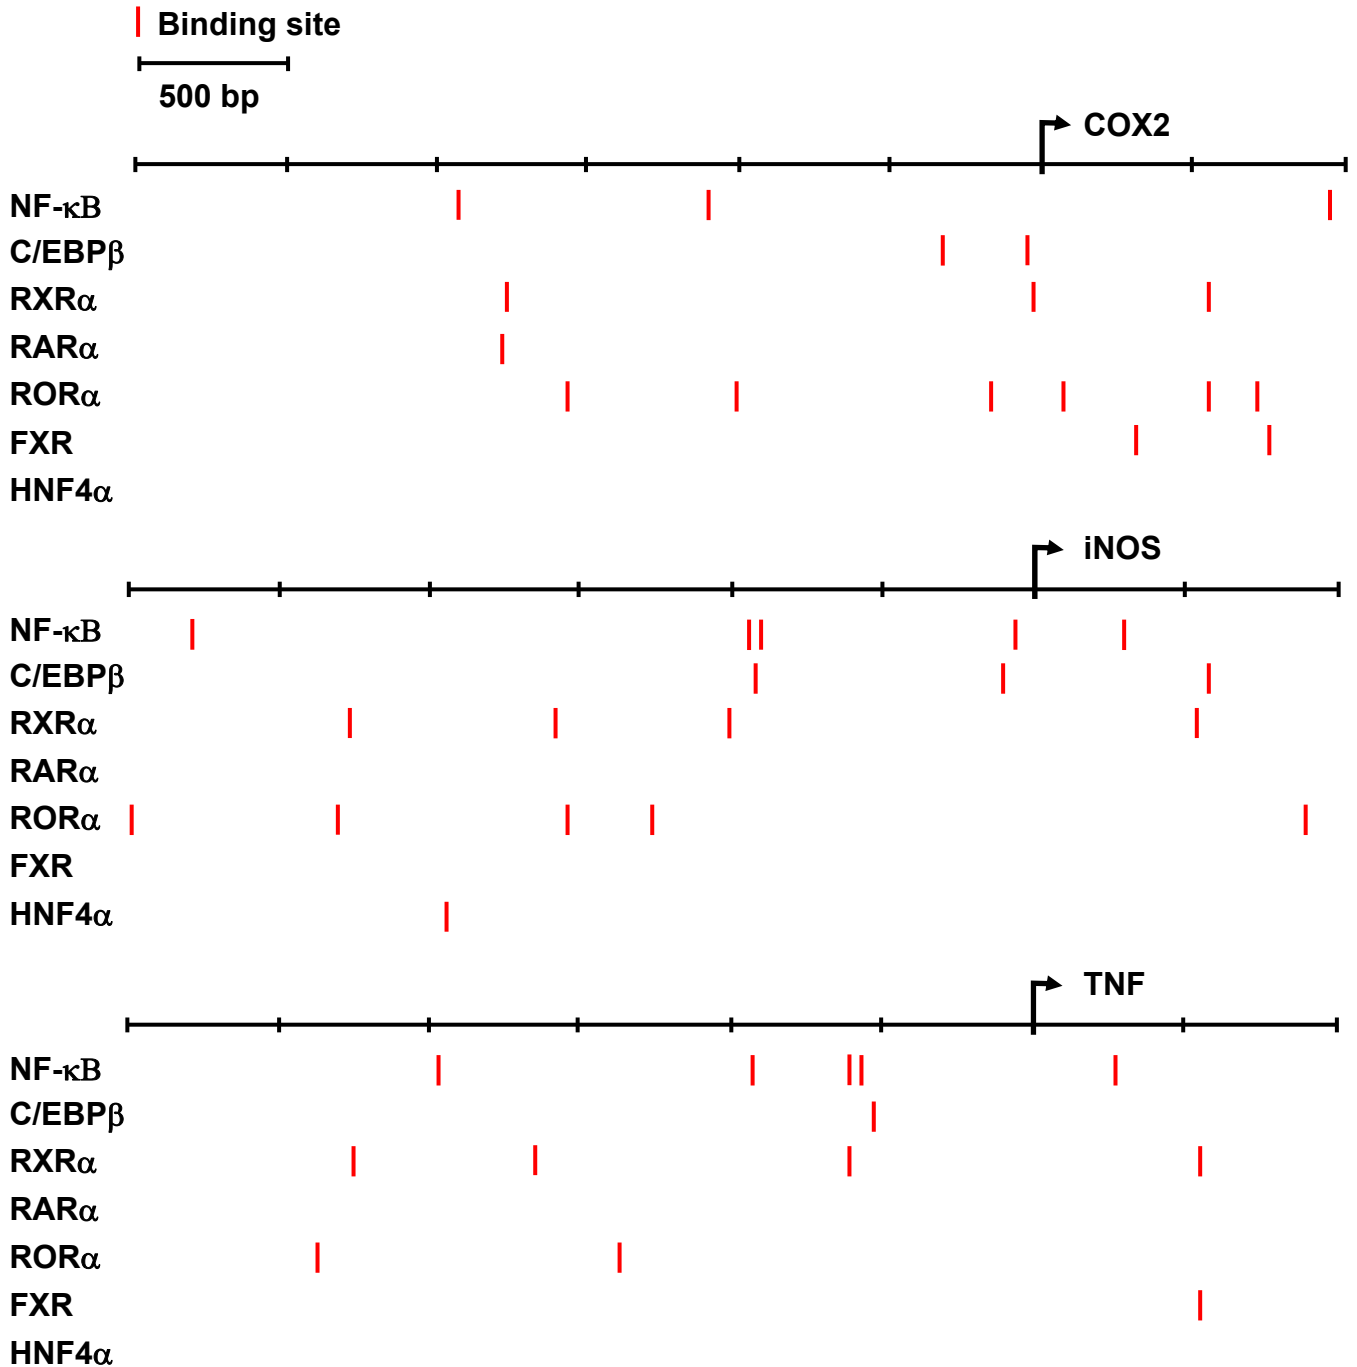

**Supplemental Figure XII. The TF binding sites of other nuclear receptors in promoters of several M2 and M1 genes.** Bioinformatics analysis of the TF binding sites of other nuclear receptors (RXR $\alpha$ , RAR $\alpha$ , ROR $\alpha$ , FXR, HNF4 $\alpha$ , NF- $\kappa$ B and C/EBP $\beta$ ) in the upstream region of M2 marker genes (*PPAR $\gamma$* , *Arg1*, *Mrc1*, and *Chi3l3*) (A), and M1 marker genes (*COX2*, *iNOS* and *TNF*) (B) by JASPAR database. -3000 bp upstream to 1000 bp downstream of these genes were used for prediction. All these nuclear receptors interact with MED1 through which regulate target genes expression. Arrows mark the location of TSS and orientation of the genes, red line indicates the location of the binding sites of these transcription factors on target genes, and every scale means 500 bp.

**Supplemental Table I. Total plasma cholesterol and triglycerides levels (mg/dL) in male MED1<sup>fl/fl</sup>/ApoE<sup>-/-</sup> and MED1<sup>ΔMac</sup>/ApoE<sup>-/-</sup> mice fed a chow diet**

| Group of mice                                        | Plasma lipid | 0 weeks | 4 weeks | 8 weeks | 12 weeks |
|------------------------------------------------------|--------------|---------|---------|---------|----------|
| MED1 <sup>fl/fl</sup> /ApoE <sup>-/-</sup><br>(n=12) | TC           | 468±31  | 546±31  | 580±44  | 683±54   |
|                                                      | TG           | 101±11  | 165±22  | 143±28  | 131±24   |
|                                                      | LDL-C        | 309±26  | 373±34  | 328±30  | 490±38   |
|                                                      | HDL-C        | 28±2    | 33±5    | 36±6    | 29±4     |
| MED1 <sup>ΔMac</sup> /ApoE <sup>-/-</sup><br>(n=12)  | TC           | 449±27  | 512±39  | 526±27  | 614±37   |
|                                                      | TG           | 115±9   | 159±18  | 118±14  | 96±6     |
|                                                      | LDL-C        | 292±17  | 309±30  | 293±19  | 412±33   |
|                                                      | HDL-C        | 28±4    | 30±5    | 37±7    | 26±5     |

**Supplemental Table II. Total plasma cholesterol and triglycerides levels (mg/dL) in male MED1<sup>fl/fl</sup>/ApoE<sup>-/-</sup> and MED1<sup>ΔMac</sup>/ApoE<sup>-/-</sup> mice after a Western diet for 12 weeks**

| <b>Mice group</b>                                    | <b>Plasma lipid</b> | <b>0 weeks</b> | <b>4 weeks</b> | <b>8 weeks</b> | <b>12 weeks</b> |
|------------------------------------------------------|---------------------|----------------|----------------|----------------|-----------------|
| MED1 <sup>fl/fl</sup> /ApoE <sup>-/-</sup><br>(n=12) | TC                  | 441±27         | 1122±70        | 1127±84        | 1319±99         |
|                                                      | TG                  | 206±29         | 278±26         | 266±30         | 314±40          |
|                                                      | LDL-C               | 199±12         | 513±36         | 648±40         | 442±51          |
|                                                      | HDL-C               | 58±10          | 78±18          | 80±11          | 81±25           |
| MED1 <sup>ΔMac</sup> /ApoE <sup>-/-</sup><br>(n=15)  | TC                  | 408±18         | 1125±70        | 1326±62        | 1373±70         |
|                                                      | TG                  | 193±29         | 283±26         | 339±33         | 269±28          |
|                                                      | LDL-C               | 183±9          | 567±42         | 774±50         | 550±62          |
|                                                      | HDL-C               | 61±11          | 68±14          | 115±18         | 72±12           |

**Supplemental Table III. Total plasma cholesterol and triglycerides levels (mg/dL) in male LDLR<sup>-/-</sup> mice transplanted with MED1<sup>fl/fl</sup> and MED1<sup>ΔMac</sup> bone marrow**

| Mice group                  | Plasma lipid | 0 weeks | 4 weeks | 8 weeks | 12 weeks |
|-----------------------------|--------------|---------|---------|---------|----------|
| MED1 <sup>fl/fl</sup> (n=7) | TC           | 244±11  | 629±26  | 546±50  | 905±29   |
|                             | TG           | 110±8   | 111±9   | 159±19  | 345±30   |
|                             | LDL-C        | 92±15   | 322±32  | 268±40  | 494±30   |
|                             | HDL-C        | 79±7    | 101±4   | 114±3   | 109±9    |
| MED1 <sup>ΔMac</sup> (n=9)  | TC           | 244±10  | 598±31  | 595±38  | 823±62   |
|                             | TG           | 110±4   | 116±15  | 171±24  | 255±30   |
|                             | LDL-C        | 112±9   | 311±20  | 293±31  | 456±44   |
|                             | HDL-C        | 76±3    | 97±3    | 114±4   | 81±11    |
