# Supplementary material
Source: PubMed Central journal article supplement (PMC5739054)

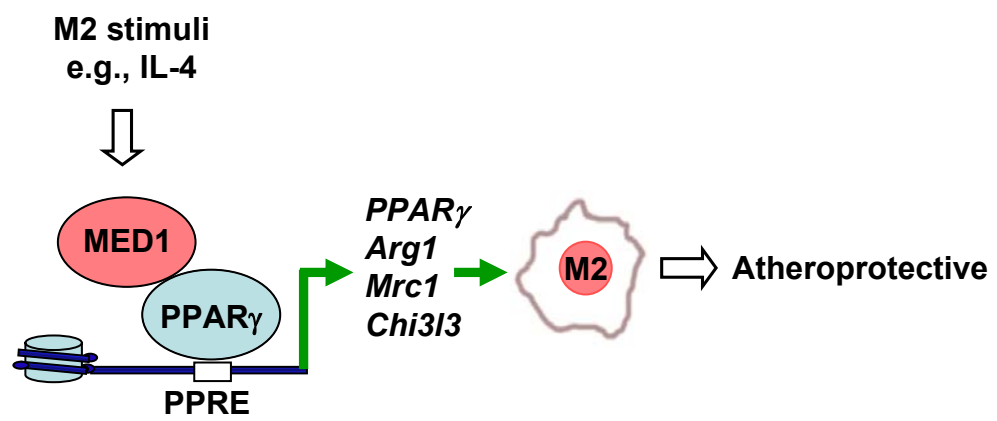

Supplement: NIHMS885639-supplement-Graphic_Abstract.pdf [file NIHMS885639-supplement-Graphic_Abstract.pdf]
